# Supplementary material for: Benzothiophenone Derivatives Targeting Mutant Forms of Estrogen Receptor-α in Hormone-Resistant Breast Cancers
Source: MDPI journal article supplement (doi:10.3390/ijms19020579), 2018-02-15
Supplement: s1 [file s1]

## Supplementary Materials: Benzothiophenone Derivatives Targeting Mutant Forms of Estrogen Receptor- $\alpha$ in Hormone-Resistant Breast Cancers

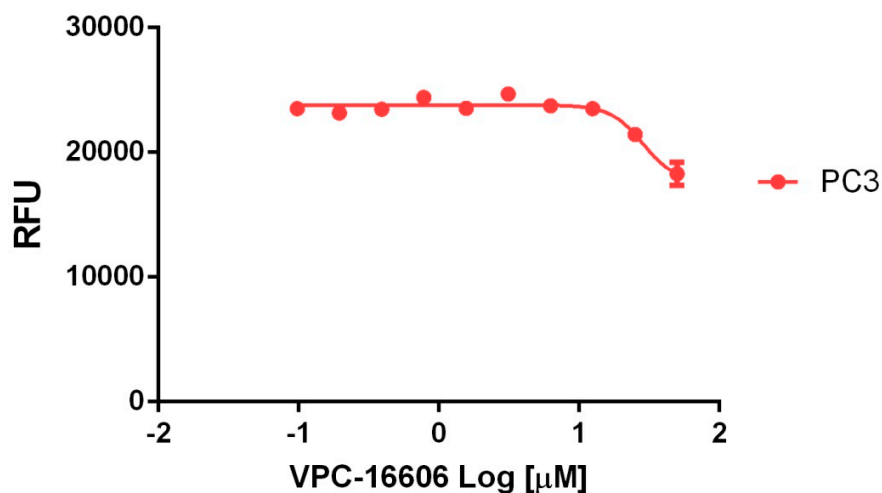

**Figure S1.** Effect of VPC-16606 on viability of PC3 cells as measured in the Presto Blue assay. Cells were treated for 96 hours with 2-fold dilution of the compound starting at 50 $\mu$ M. Error bars represent standard deviation for two independent experiments performed in triplicates.

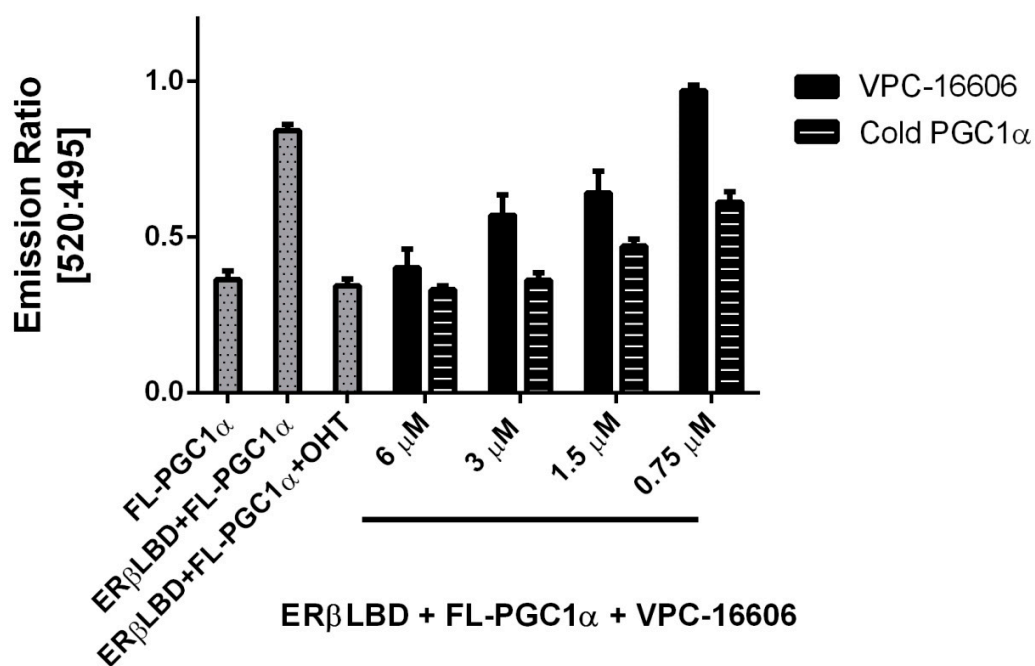

**Figure S2.** TR-FRET Assay showing displacement of Fluorescein labelled PGC1 $\alpha$  peptide by VPC-16606 upon incubation with ER $\beta$ -LBD. OHT was used at 1 $\mu$ M. Error bars represent standard deviation for two independent experiments performed in triplicates.
